# Supplementary material for: Manipulation of light quality is an effective tool to regulate photosynthetic capacity and fruit antioxidant properties of Solanum lycopersicum L. cv. ‘Microtom’ in a controlled environment
Source: PeerJ. 2022 Jul 1;10:e13677. doi: 10.7717/peerj.13677 (PMC9252183; doi:10.7717/peerj.13677)
Supplement: Supplemental Information 3 [file peerj-10-13677-s003.xlsx]

## Sheet: morphological & functional
Height				Leaf number				Flower number				Fruit number				Fruit weight
FL	RB	RGB		FL	RB	RGB		FL	RB	RGB		FL	RB	RGB		FL	RB	RGB
15	12	11.5		26	31	31		56	42	39		20	12	9		37.92	32.94	19.1
15.7	12.2	11.2		22	42	27		47	55	34		24	16	9		33.6	23.88	18
18	12.1	12.3		20	40	32		43	43	40		12	14	9		34.9	29.21	21.9
14	14	10		23	37	30		53	55	37		18	14	11		33.9	19.12	18.3
15.6	10.5	11.3		22	38	30		51	40	33		19	17	12		33.6	38.6	19
15.66	12.16	11.26		22.6	37.6	30		50	47	36.6		18.6	14.6	10		34.784	28.75	19.26
0.658483	0.555518	0.369594		0.979796	1.86011	0.83666		2.28035	3.30151	1.36382		1.93907	0.87178	0.632456		0.819546	3.40032	0.691809
SB/EB				LB/EB				FB/EB
FL	RB	RGB		FL	RB	RGB		FL	RB	RGB
0.243	0.247	0.29		0.183	0.221	0.302		0.574	0.532	0.408
0.224	0.253	0.254		0.153	0.266	0.315		0.623	0.481	0.431
0.234	0.249	0.273		0.168	0.244	0.303		0.598	0.507	0.424
0.225	0.251	0.27		0.156	0.22	0.309		0.619	0.529	0.421
0.242	0.25	0.271		0.182	0.268	0.314		0.576	0.482	0.415
0.2336	0.25	0.2716		0.1684	0.2438	0.3086		0.598	0.5062	0.4198
0.00403237	0.001	0.00571489		0.00628172	0.0104038	0.00269444		0.0103102	0.01097	0.00391663
LA				SLA				LDMC				RWC
FL	RB	RGB		FL	RB	RGB		FL	RB	RGB		FL	RB	RGB
15.4	17.56	11.23		307.69	408.29	377.51		0.103	0.083	0.096		84.33	85.42	77.78
13.87	13.92	10.78		345.95	377.34	395.98		0.091	0.081	0.081		81.48	80.24	82.65
12.89	15.38	10.51		310.92	422.71	424.8		0.107	0.083	0.078		80.1	83.03	76.08
15	15.95	12.15		293.04	409.32	380.24		0.104	0.079	0.085		82.84	82.18	78.98
13.17	15.3	9.51		350.14	428.84	420.08		0.1	0.085	0.083		81.1	83.59	78.65
14.066	15.622	10.836		321.548	409.3	399.722		0.101	0.0822	0.0846		81.97	82.892	78.828
0.493767	0.588323	0.432985		11.2487	8.89972	9.82415		0.00273861	0.0010198	0.00307571		0.735541	0.84962	1.07964

## Sheet: Gas exchanges & Photochemistry
fPSII				NPQ				Fv/Fm
FL	RB	RGB		FL	RB	RGB		FL	RB	RGB
0.74	0.65	0.77		0.367	0.504	0.304		0.81	0.71	0.8
0.75	0.66	0.75		0.531	0.588	0.324		0.82	0.8	0.81
0.74	0.66	0.77		0.333	0.572	0.21		0.81	0.71	0.81
0.71	0.67	0.76		0.456	0.498	0.263		0.8	0.76	0.81
0.72	0.63	0.77		0.332	0.538	0.21		0.81	0.71	0.81
0.732	0.654	0.764		0.4038	0.54	0.2622		0.81	0.738	0.808
0.00734847	0.00678233	0.004		0.0390044	0.0178774	0.02347		0.00316228	0.0182757	0.002
AN				gs				gm				Vcmax
FL	RB	RGB		FL	RB	RGB		FL	RB	RGB		FL	RB	RGB
14.54	14.58	16.88		0.72	0.729	0.785		0.125	0.132	0.153		133.54	114.2	159.85
15.01	14.3	15.98		0.678	0.73	0.754		0.13	0.136	0.149		132.19	113.69	162.47
13.98	13.96	16.68		0.756	0.741	0.81		0.11	0.139	0.148		133.25	115.01	160.8
14.7	14.55	15.8		0.657	0.732	0.748		0.119	0.128	0.154		130.85	114.4	159.7
14.4	13.92	17.34		0.8	0.719	0.772		0.118	0.127	0.155		136.97	113.01	160.88
14.526	14.262	16.536		0.7222	0.7302	0.7738		0.1204	0.1324	0.1518		133.36	114.062	160.74
0.170106	0.1403	0.286035		0.025889	0.00351283	0.0111732		0.00338526	0.00229347	0.00139284		1.01847	0.337423	0.494459

## Sheet: Pigments & Proteins
CHL a+b				CAR x+c				CHL a/b
FL	RB	RGB		FL	RB	RGB		FL	RB	RGB
138.24	53.27	66.56		13.32	7.46	7.24		2.01	2.68	2.31
89.59	50.77	73.98		10.22	5.57	8.02		2.22	2.35	2.4
90.92	32.18	89.8		8.32	4.05	9.69		1.9	2.47	2.38
80.39	62.94	64.58		7.57	8.83	6.92		1.98	2.52	2.16
99.81	49.82	73.7		9.86	6.5	8.01		2.02	2.52	2.3
99.79	49.796	73.724		9.858	6.482	7.976		2.026	2.508	2.31
10.0933	4.98049	4.43531		0.992897	0.812905	0.479464		0.0528772	0.0530471	0.04219
D1				Rubisco
FL	RB	RGB		FL	RB	RGB
15.7	13	15		32.6	29.6	63.8
14.4	12.1	14.3		39.8	24.6	64.5
14.8	14	14.6		32.7	23.7	63.5
14.97	13.03	14.63		35.03	25.97	63.93
0.384419	0.548736	0.202759		2.383	1.835	0.296

## Sheet: Fruits
AsA				CAT				SOD				Antiox capacity				Polyphenols
FL	RB	RGB		FL	RB	RGB		FL	RB	RGB		FL	RB	RGB		FL	RB	RGB
16.652	12.631	15.002		85.25	102.02	92.26		36.88	55.9	41.46		0.677	1.293	0.87		6.7842	37.7464	2.653
14.162	12.151	15.212		88.71	114.43	83.39		44.1	55.74	42.85		0.585	1.322	0.911		9.1127	45.7632	3.5803
17.402	12.511	17.342		95.81	117.1	78.95		30.9	62.87	38.5		0.665	1.378	0.917		4.7462	33.6182	3.4829
15.5	12.6	16.65		93.45	108.67	85.5		39.5	54.8	39.82		0.545	1.298	0.857		5.0133	45.6171	3.6743
16.644	12.262	15.05		86.39	113.69	84.22		32.98	50.12	44.67		0.561	1.464	0.878		4.9458	45.7048	3.5908
16.072	12.431	15.8512		89.922	111.182	84.864		36.872	55.886	41.46		0.6066	1.351	0.8866		6.12044	41.6899	3.39626
0.566029	0.0953735	0.481259		2.03577	2.66566	2.15253		2.34481	2.0399	1.08829		0.0271175	0.032025	0.0117158		0.833315	2.53809	0.188277
